# Supplementary material
Source: PubMed Central journal article supplement (PMC1482594)
Supplement: pnas_0600635103_10.pdf [file pnas_0600635103_10.pdf]

**Table 1. Cell labeling**

| Markers                                           | Function                                | Antibody              |
|---------------------------------------------------|-----------------------------------------|-----------------------|
| 1. CSC epitopes                                   |                                         |                       |
| c-kit                                             | Stem cell factor receptor               | conjugated primary Ab |
| MDR1                                              | ABC cassette transporter                | conjugated primary Ab |
| Sca-1                                             | Adhesion molecule                       | conjugated primary Ab |
| 2. Transcription factors of cardiac cell lineages |                                         |                       |
| GATA-4                                            | Differentiation of cardiac cells        | conjugated primary Ab |
| MEF2C                                             | Differentiation of cardiomyocytes       | conjugated primary Ab |
| GATA-5                                            | Regulator of Nkx2.5                     | conjugated primary Ab |
| GATA-6                                            | Differentiation of VSMCs                | conjugated primary Ab |
| Ets1                                              | Differentiation of ECs                  | conjugated primary Ab |
| 3. Structural proteins of cardiac cell lineages   |                                         |                       |
| Nestin                                            | Intermediate filament of immature cells | primary/secondary Ab  |
| Desmin                                            | Intermediate filament of muscle cells   | primary/secondary Ab  |
| $\alpha$ -sarcomeric actin                        | Contractile protein of cardiomyocytes   | primary/secondary Ab  |
| Cardiac myosin                                    | Contractile protein of cardiomyocytes   | primary/secondary Ab  |
| Connexin 43                                       | Electrical coupling                     | primary/secondary Ab  |
| N-cadherin                                        | Mechanical coupling                     | primary/secondary Ab  |
| $\alpha$ -SM actin                                | Contractile protein of VSMCs            | primary/secondary Ab  |
| TGF $\beta$ 1 receptor                            | VSMC receptor                           | primary/secondary Ab  |
| flk1                                              | VEGF2 receptor in                       | primary/secondary Ab  |

| Markers                                                | Function                            | Antibody              |
|--------------------------------------------------------|-------------------------------------|-----------------------|
|                                                        | ECs                                 |                       |
| Von Willebrand factor                                  | Factor VIII receptor in ECs         | primary/secondary Ab  |
| Vimentin                                               | Intermediate filament in ECs and Fs | primary/secondary Ab  |
| 4. Junctional proteins                                 |                                     |                       |
| Connexin 45                                            | Electrical coupling                 | primary/secondary Ab  |
| N-cadherin                                             | Mechanical coupling                 | primary/secondary Ab  |
| 5. Integrin receptors and extracellular ligands        |                                     |                       |
| $\alpha_4$ -integrin                                   | ECM receptor                        | primary/secondary Ab  |
| $\beta_1$ -integrin                                    | ECM receptor                        | primary/secondary Ab  |
| $\alpha_2$ -laminin                                    | ECM protein                         | primary/secondary Ab  |
| Laminin-8/9                                            | ECM protein                         | primary/secondary Ab  |
| Laminin-10/11                                          | ECM protein                         | primary/secondary Ab  |
| Fibronectin                                            | ECM protein                         | primary/secondary Ab  |
| 6. Proliferation and symmetric and asymmetric division |                                     |                       |
| BrdU                                                   | S phase marker                      | primary/secondary Ab  |
| MCM5                                                   | cell cycle protein                  | primary/secondary Ab  |
| Phosphohistone-H3                                      | progression of mitosis              | primary/secondary Ab  |
| Numb                                                   | endocytic protein                   | primary/secondary Ab  |
| $\alpha$ -adaptin                                      | endocytic protein                   | primary/secondary Ab  |
| 7. Hematopoietic markers                               |                                     |                       |
| GATA-1                                                 | Differentiation of blood cells      | conjugated primary Ab |
| GATA-2                                                 | Differentiation of blood cells      | conjugated primary Ab |
| CD34                                                   | HSC/EC antigen                      | conjugated primary Ab |
| CD45                                                   | Pan-myeloid marker                  | conjugated primary Ab |
| CD45RO                                                 | T lymphocyte subset marker          | conjugated primary Ab |
| CD8                                                    | T lymphocyte subset marker          | conjugated primary Ab |

| Markers                    | Function                          | Antibody              |
|----------------------------|-----------------------------------|-----------------------|
| CD20                       | B lymphocyte marker               | conjugated primary Ab |
| TER-119                    | Erythroid marker                  | conjugated primary Ab |
| 8. Neural cell markers     |                                   |                       |
| MAP1b                      | N-specific<br>microtubule protein | conjugated primary Ab |
| NF200                      | neurofilament protein             | conjugated primary Ab |
| GFAP                       | mature glial marker               | conjugated primary Ab |
| 9. Skeletal muscle markers |                                   |                       |
| MyoD                       | SKMC differentiation              | conjugated primary Ab |
| Myogenin                   | SKMC differentiation              | conjugated primary Ab |
| Myf5                       | SKMC differentiation              | conjugated primary Ab |

CSC, cardiac stem cell; VSMC, vascular smooth muscle cell; EC, endothelial cell; Fs: fibroblasts; ECM, extracellular matrix; HSC, hematopoietic stem cell; N, neuron; SKMC, skeletal muscle cell; Ab, antibody.

Sources of antibodies: AG Scientific (San Diego),  $\alpha_2$ -laminin; Cedarlane Laboratories, Sca-1; Chemicon, MDR1, and cardiac myosin; DAKO, c-kit, CD45, CD45RO, and CD8; Developmental Studies Hybridoma Bank, nestin; Pharmingen,  $\alpha_4$ -integrin,  $\beta_1$ -integrin, and TER-119; Roche, BrdU; Santa Cruz Biotechnology, GATA-4, MEF2C, GATA-5, GATA-6, Ets1, N-cadherin, TGF $\beta$ 1 receptor, flk1, connexin 45, E-cadherin, laminin-8/9, laminin-10/11, fibronectin, MCM5, Numb, adaptin, GATA-1, GATA-2, CD34, CD20, MyoD, myogenin, and Myf5; Sigma, desmin,  $\alpha$ -sarcomeric actin, connexin 43,  $\alpha$ -smooth muscle actin, von Willebrand factor, vimentin, MAP1b, NF200, and GFAP; Upstate Biotechnology (Lake Placid, NY), phosphohistone-H3.
