# Supplementary material
Source: PubMed Central journal article supplement (PMC1482594)

Sca-1

vWf

GATA-4

cardiac myosin

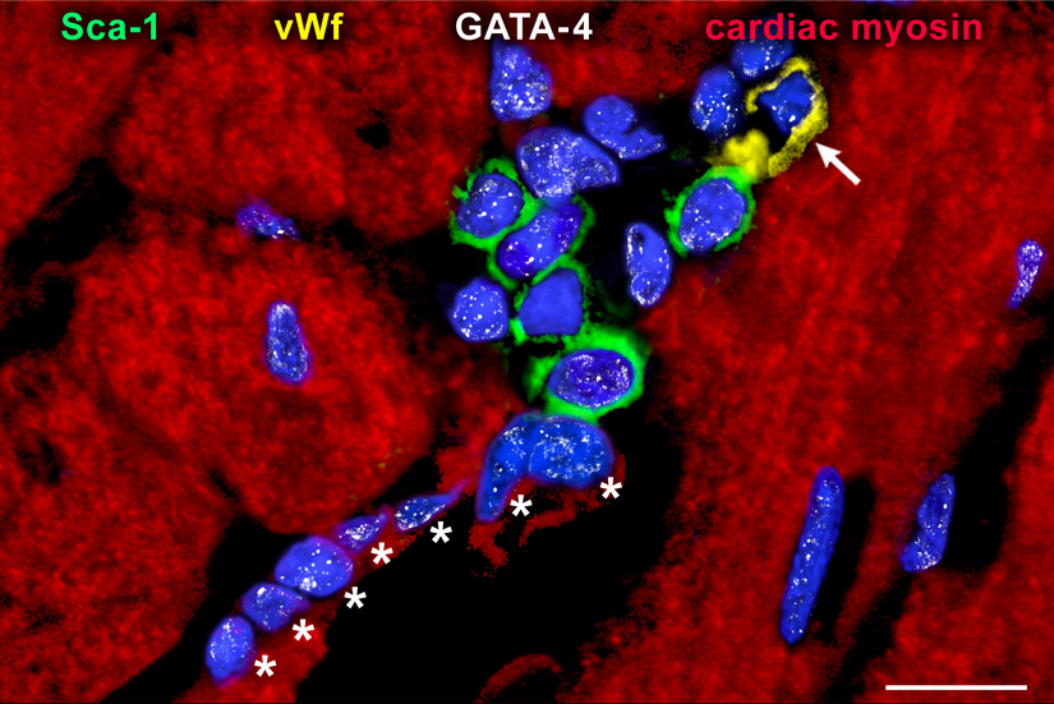

Supplement: pnas_0600635103_1.pdf [file pnas_0600635103_1.pdf]

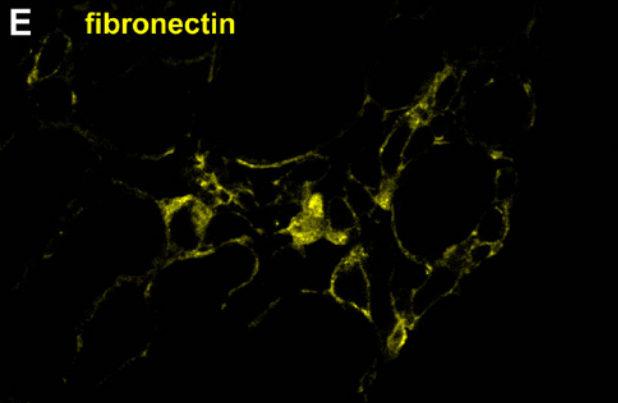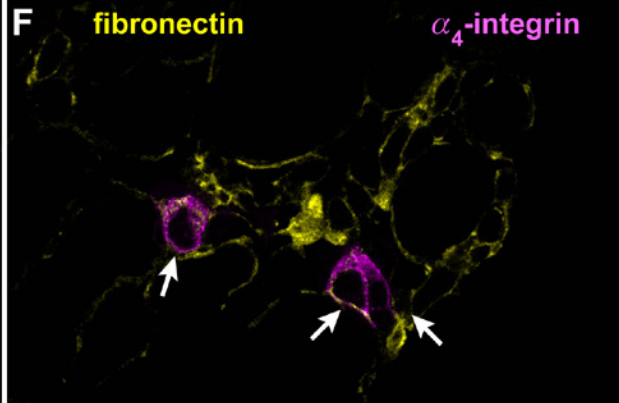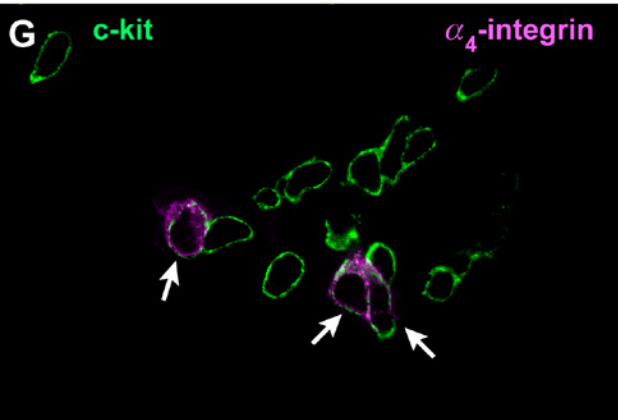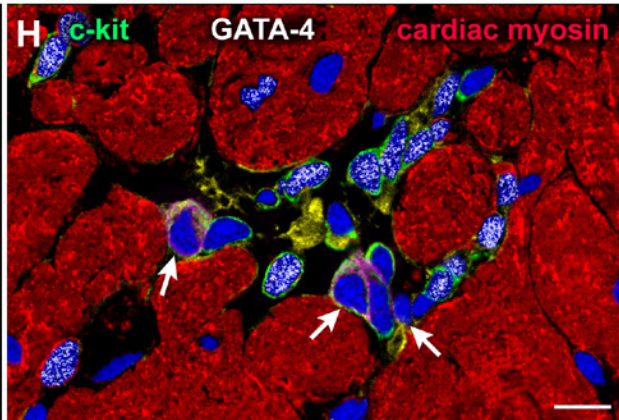

Supplement: pnas_0600635103_11.pdf [file pnas_0600635103_11.pdf]

**A**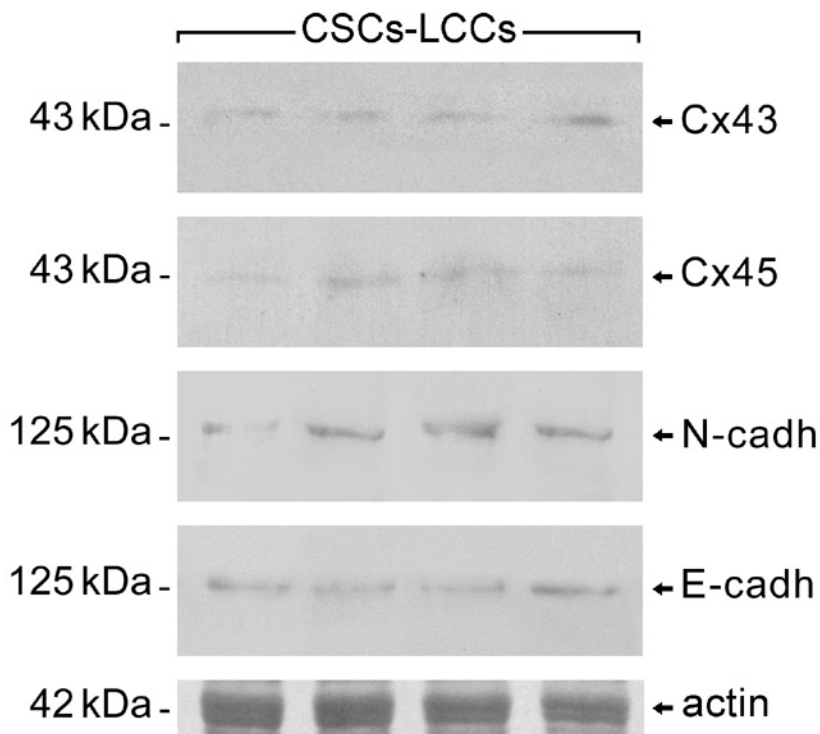**B**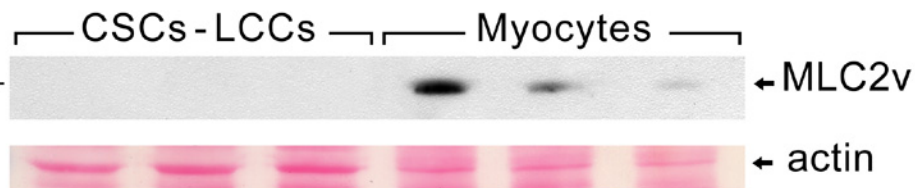

Supplement: pnas_0600635103_2.pdf [file pnas_0600635103_2.pdf]

**A****Calcein+Dil**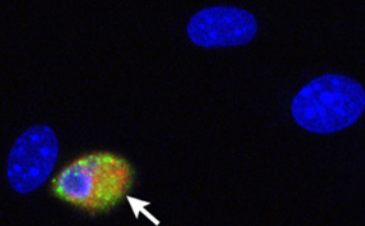**B****Calcein+Dil****vWf**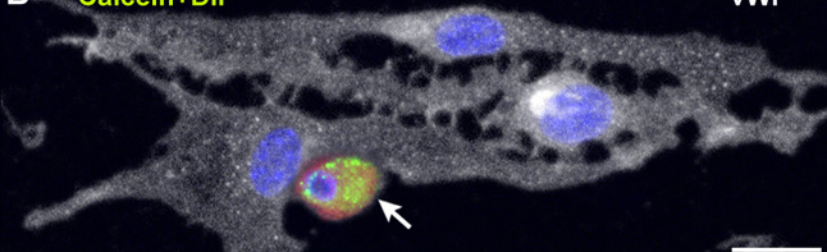

Supplement: pnas_0600635103_3.pdf [file pnas_0600635103_3.pdf]

**A**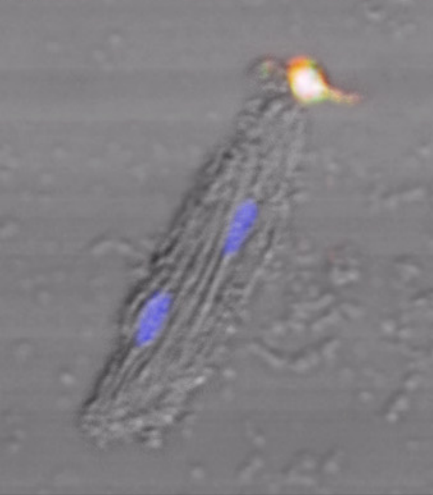**B**

calcein Dil Hoechst 33342

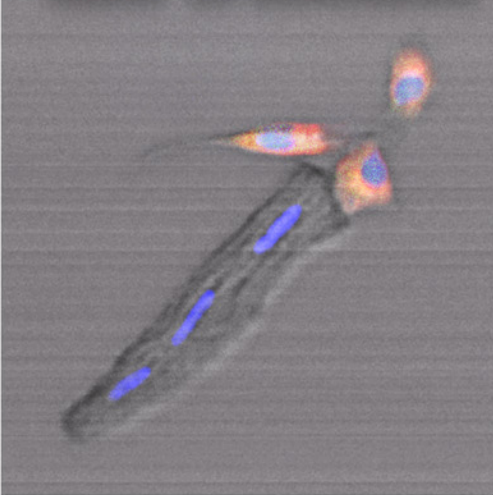**C**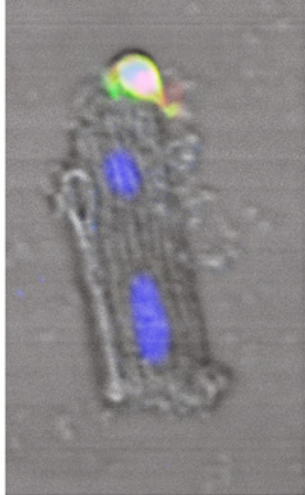**D**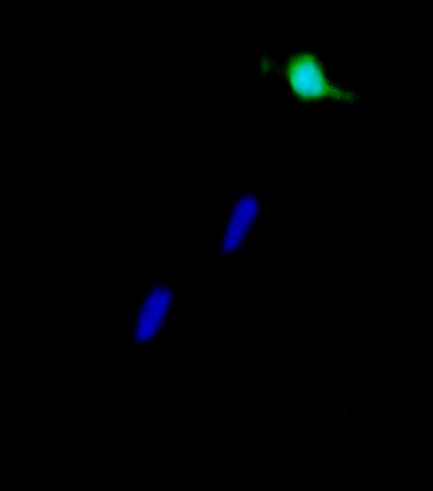**E**

calcein Hoechst 33342

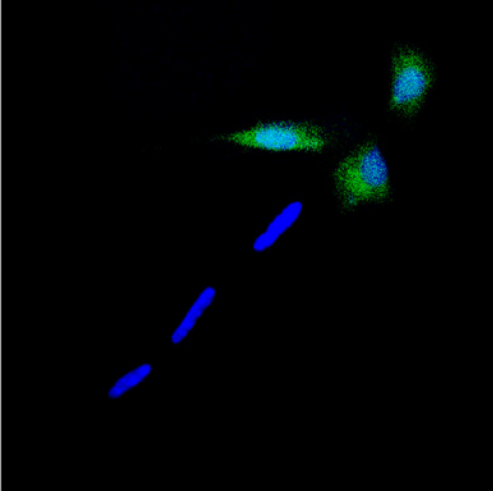**F**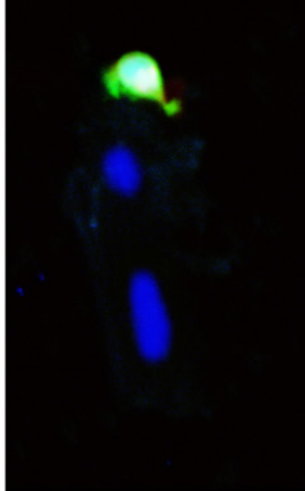**G**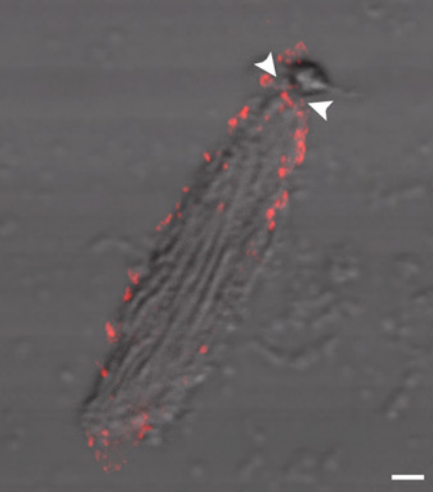**H**

Connexin 43

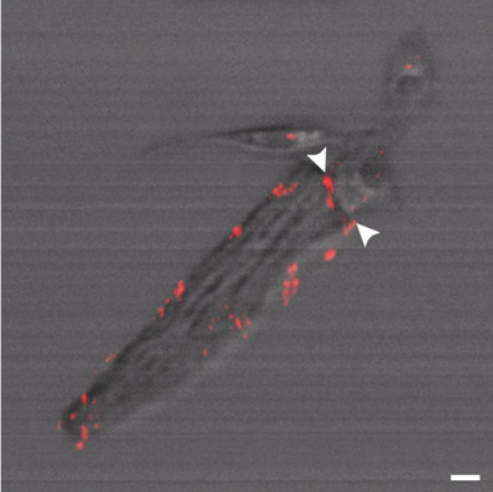**I**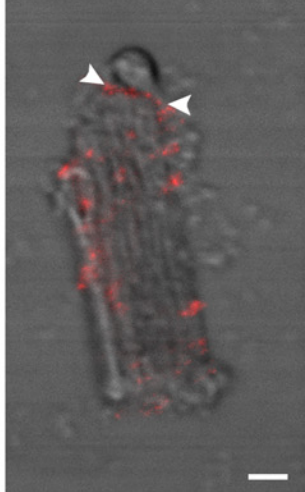

Supplement: pnas_0600635103_4.pdf [file pnas_0600635103_4.pdf]

c-kit

GATA-4

laminin

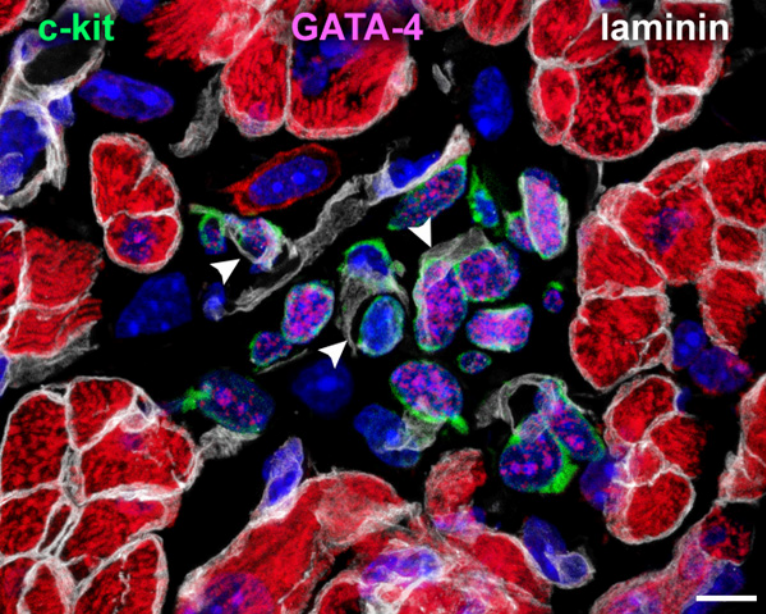

Supplement: pnas_0600635103_5.pdf [file pnas_0600635103_5.pdf]

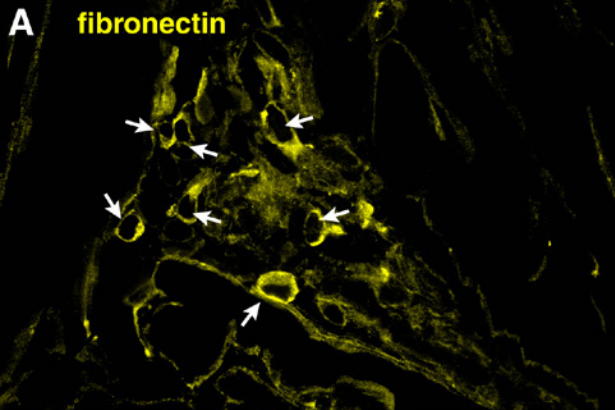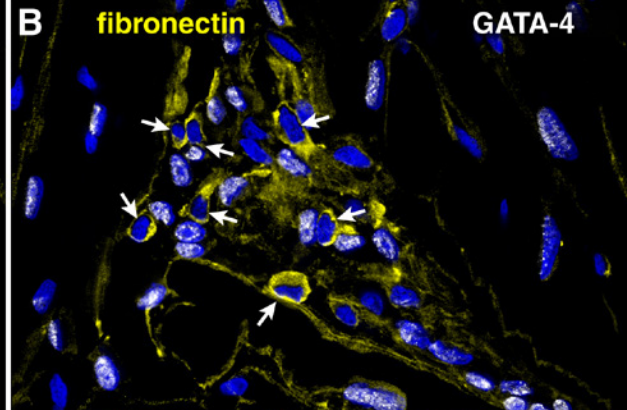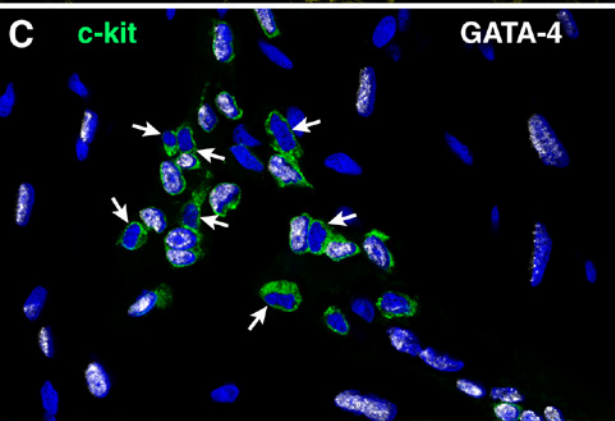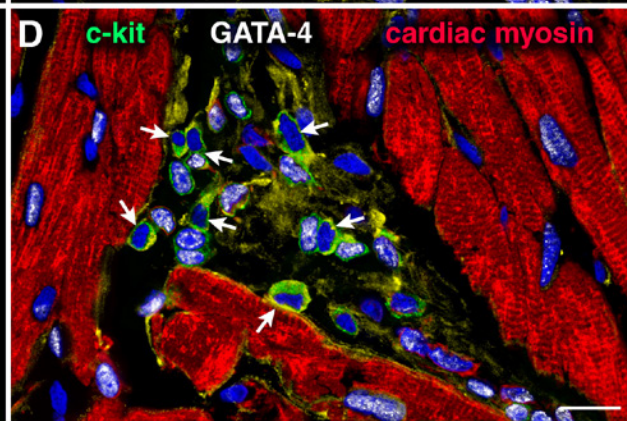

Supplement: pnas_0600635103_6.pdf [file pnas_0600635103_6.pdf]

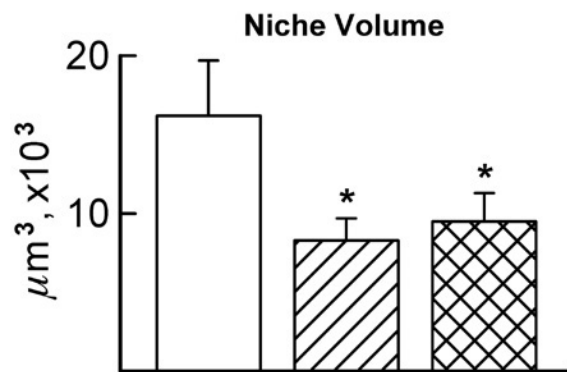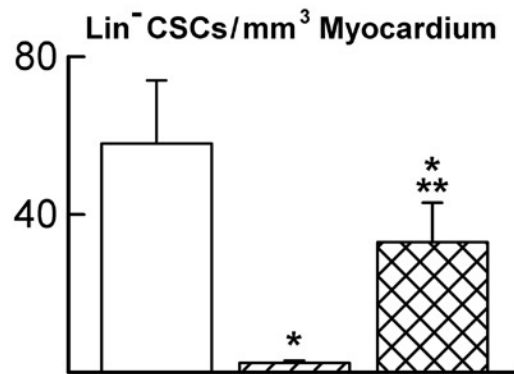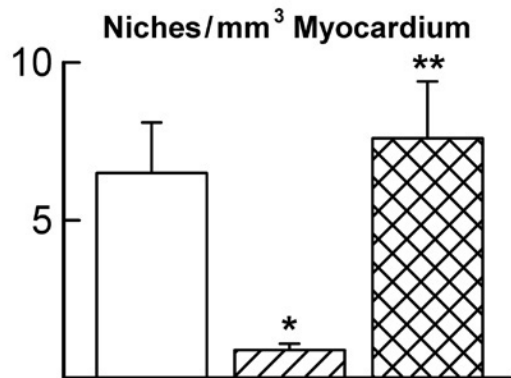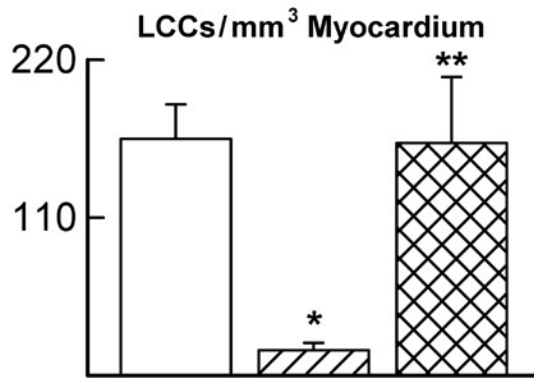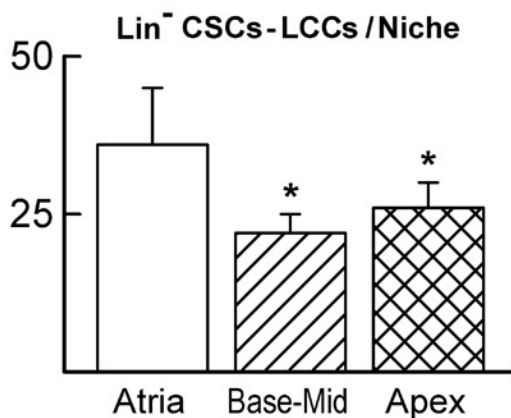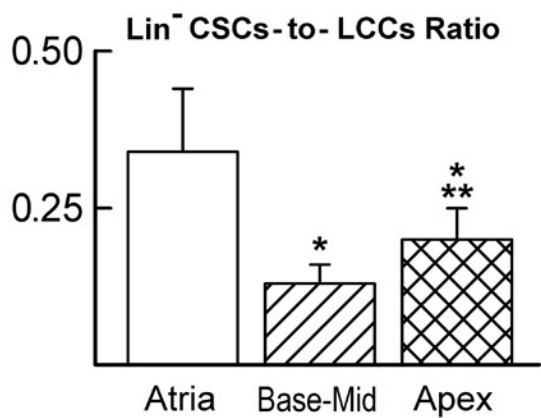

Supplement: pnas_0600635103_7.pdf [file pnas_0600635103_7.pdf]

# BrdU Labeling of Lin<sup>-</sup> CSCs

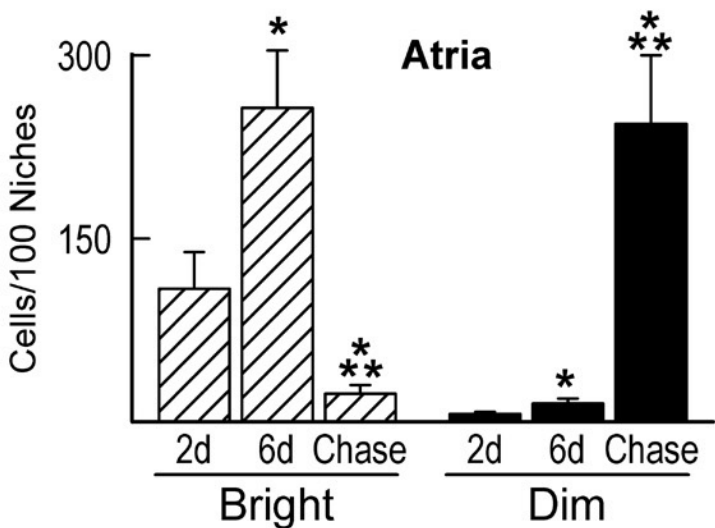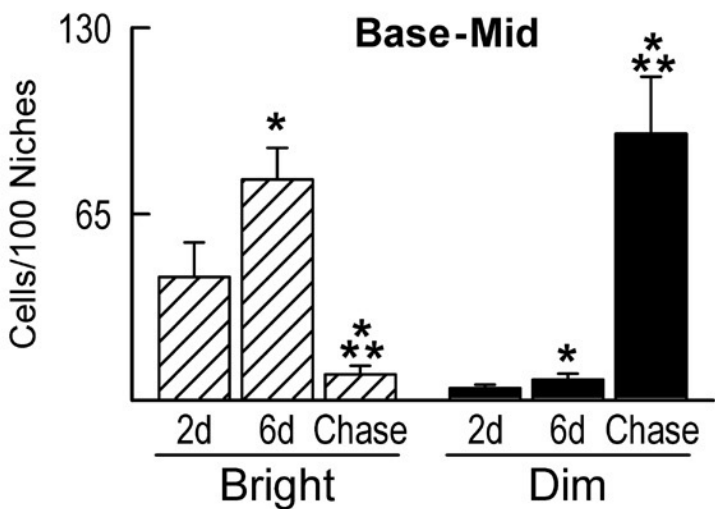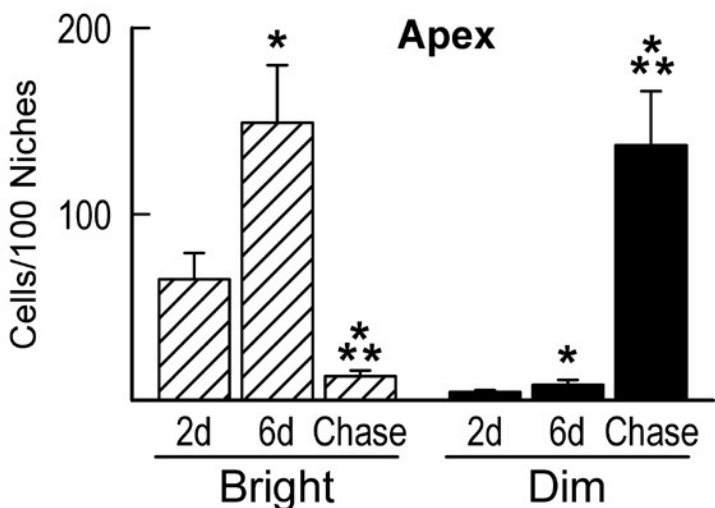

Supplement: pnas_0600635103_8.pdf [file pnas_0600635103_8.pdf]
